# Supplementary material for: Early Stroke Induces Long-Term Impairment of Adult Neurogenesis Accompanied by Hippocampal-Mediated Cognitive Decline
Source: MDPI journal article supplement (doi:10.3390/cells8121654), 2019-12-17
Supplement: s1 [file s1]

## Supplement S4: Ki67-positive cells and neurogenesis

### Ki67-positive cells

#### Statistical differences within sham groups

sham groups:

6m *versus* 7.5m:  $U = 3.00$ ;  $n = 11$ ;  $p = 0.028$

6m *versus* 9m:  $U < 0.001$ ;  $n = 10$ ;  $p = 0.009$

7.5m *versus* 9m:  $U < 0.001$ ;  $n = 10$ ;  $p = 0.009$

#### Statistical differences within MCAO groups

MCAO groups:

6m *versus* 7.5m:  $U = 5.00$ ;  $n = 12$ ;  $p = 0.042$

6m *versus* 9m:  $U < 0.001$ ;  $n = 13$ ;  $p = 0.003$

7.5m *versus* 9m:  $U = 3.00$ ;  $n = 11$ ;  $p = 0.009$

#### Statistical differences between sham and MCAO

6 month groups:

Sham: Mdn = 588 cells; IqR = 348

MCAO: Mdn = 606 cells; IqR = 285;  $U = 17.50$ ;  $n = 13$ ;  $p = 0.617$

7.5 month groups:

Sham: Mdn = 432 cells; IqR = 114

MCAO: Mdn = 372 cells; IqR = 120;  $U = 5.00$ ;  $n = 10$ ;  $p = 0.112$

9 month groups:

Sham: Mdn = 300 cells; IqR = 78.00

MCAO: Mdn = 132 cells; IqR = 72.00;  $U < 0.001$ ;  $n = 11$ ;  $p = 0.006$

### Adult neurogenesis

#### Statistical differences within sham groups

sham groups:

6m *versus* 7.5m:  $U = 17.00$ ;  $n = 14$ ;  $p = 0.383$

6m *versus* 9m:  $U = 21.00$ ;  $n = 13$ ;  $p = 1.000$

7.5m *versus* 9m:  $U = 10.00$ ;  $n = 13$ ;  $p = 0.138$

6m *versus* 20m:  $U < 0.001$ ;  $n = 13$ ;  $p = 0.001$

7.5m *versus* 20m:  $U < 0.001$ ;  $n = 13$ ;  $p = 0.001$

9m *versus* 20m:  $U < 0.001$ ;  $n = 12$ ;  $p = 0.002$

### Statistical differences within MCAO groups

6m *versus* 7.5m: U = 17.00; n = 14; p = 0.016  
6m *versus* 9m: U = 21.00; n = 13; p = 0.111  
7.5m *versus* 9m: U = 10.00; n = 13; p = 0.556  
6m *versus* 20m: U < 0.001; n = 12; p = 0.003  
7.5m *versus* 20m: U < 0.001; n = 12; p = 0.003  
9m *versus* 20m: U < 0.001; n = 11; p = 0.006

### Statistical differences between sham and MCAO

#### 6 month group:

Sham: Mdn = 1614 cells; IqR = 927  
MCAO: Mdn = 1270 cells; IqR = 924; U = 12.50; n = 12; p = 0.432

#### 7.5 month group:

Sham: Mdn = 1492 cells; IqR = 750  
MCAO: Mdn = 801 cells; IqR = 374; U = 1.00; n = 12; p = 0.005

#### 9 month group:

Sham: Mdn = 1604 cells; IqR = 680  
MCAO: Mdn = 1026 cells; IqR = 830; U = 1.00; n = 10; p = 0.019

#### 20-month-old group:

Sham: Mdn = 13 cells; IqR = 28.13  
MCAO: Mdn = 28 cells; IqR = 37.50; U = 15.00; n = 13; p = 0.445
