# Supplementary material for: Early Stroke Induces Long-Term Impairment of Adult Neurogenesis Accompanied by Hippocampal-Mediated Cognitive Decline
Source: MDPI journal article supplement (doi:10.3390/cells8121654), 2019-12-17
Supplement: s1 [file s1]

## Supplement S6: WaterMaze data

### Water Maze distance, latency and velocity:

#### Statistical differences within sham groups

|                         |                                |
|-------------------------|--------------------------------|
| <i>Distance:</i>        | $p = 0.148$ , $F(3) = 1.958$   |
| 6m <i>versus</i> 7.5m:  | $p = 1.000$                    |
| 6m <i>versus</i> 9m:    | $p = 0.302$                    |
| 6m <i>versus</i> 20m:   | $p = 1.000$                    |
| 7.5m <i>versus</i> 9m:  | $p = 0.427$                    |
| 7.5m <i>versus</i> 20m: | $p = 1.000$                    |
| 9m <i>versus</i> 20m:   | $p = 0.304$                    |
| <i>Latency:</i>         | $p = 0.037$ ; $F(3) = 3.337$   |
| 6m <i>versus</i> 7.5m:  | $p = 1.000$                    |
| 6m <i>versus</i> 9m:    | $p = 0.237$                    |
| 6m <i>versus</i> 20m:   | $p = 1.000$                    |
| 7.5m <i>versus</i> 9m:  | $p = 0.371$                    |
| 7.5m <i>versus</i> 20m: | $p = 1.000$                    |
| 9m <i>versus</i> 20m:   | $p = 0.031$                    |
| <i>Velocity:</i>        | $p < 0.001$ , $F(3) = 45.72$ ; |
| 6m <i>versus</i> 7.5m:  | $p = 1.000$ ;                  |
| 6m <i>versus</i> 9m:    | $p < 0.001$ ;                  |
| 6m <i>versus</i> 20m:   | $p < 0.001$ ;                  |
| 7.5m <i>versus</i> 9m:  | $p < 0.001$ ;                  |
| 7.5m <i>versus</i> 20m: | $p < 0.001$ ;                  |
| 9m <i>versus</i> 20m:   | $p < 0.001$ ;                  |

#### Statistical differences within MCAO groups

|                          |                                 |
|--------------------------|---------------------------------|
| <i>Distance:</i>         | $p < 0.001$ ; $F(3) = 21.069$   |
| 6m <i>versus</i> 7.5m:   | $p = 1.000$                     |
| 6m <i>versus</i> 9m:     | $p < 0.001$                     |
| 6m <i>versus</i> 20m:    | $p = 0.001$                     |
| 7.5m <i>versus</i> 9m:   | $p < 0.001$                     |
| 7.5m <i>versus</i> 20m:  | $p < 0.001$                     |
| 9m <i>versus</i> 20m:    | $p = 0.232$                     |
| <i>Latency:</i>          | $p = 0.065$ ; $F(3) = 2.840$    |
| 6m <i>versus</i> 7.5m:   | $p = 1.000$                     |
| 6m <i>versus</i> 9m:     | $p = 1.000$                     |
| 6m <i>versus</i> 20m:    | $p = 0.203$                     |
| 7.5m <i>versus</i> 9m:   | $p = 1.000$                     |
| 7.5m <i>versus</i> 20m:  | $p = 0.131$                     |
| 9m <i>versus</i> 20m:    | $p = 1.000$                     |
| <i>Velocity:</i>         | $p < 0.001$ , $F(3) = 16.654$ ; |
| 6m <i>versus</i> 7.5m:   | $p = 1.000$ ;                   |
| 6m <i>versus</i> 9m:     | $p = 0.001$ ;                   |
| 6m <i>versus</i> 20m:    | $p = 1.000$ ;                   |
| 7.5m <i>versus</i> 9m:   | $p < 0.001$ ;                   |
| 7.5 m <i>versus</i> 20m: | $p = 1.000$ ;                   |

9m *versus* 20m:  $p < 0.001$ ;

### Statistical differences between sham and MCAO

#### *Distance*

6m:  $p < 0.001$ ;  $F(1) = 31.635$   
7.5m:  $p < 0.001$ ;  $F(1) = 39.212$   
9m:  $p = 0.341$ ;  $F(1) = 1.024$   
20m:  $p = 0.179$ ;  $F(1) = 2.016$

#### *Latency*

6m:  $p < 0.001$ ;  $F(1) = 30.755$   
7.5m:  $p = 0.004$ ;  $F(1) = 13.188$   
9m:  $p = 0.584$ ;  $F(1) = 0.326$   
20m:  $p = 0.105$ ;  $F(1) = 3.029$

#### *Velocity*

6m:  $p = 0.227$ ,  $F(1) = 1.657$ ;  
7.5m:  $p = 0.005$ ,  $F(1) = 12.00$ ;  
9m:  $p = 0.707$ ,  $F(1) = 0.152$ ;  
20m:  $p = 0.106$ ,  $F(1) = 3.013$

### Statistical differences between sham and MCAO

#### *Distance:*

##### *Day1*

6m MCAO *versus* sham:  $p = 1.000$ ;  $F(1) = 3.216$   
7.5m MCAO *versus* sham:  $p = 0.599$ ;  $F(1) = 0.293$   
9m MCAO *versus* sham:  $p = 0.018$ ;  $F(1) = 8.834$   
20m MCAO *versus* sham:  $p = 0.503$ ;  $F(1) = 0.467$

##### *Day2*

6m MCAO *versus* sham:  $p < 0.001$ ;  $F(1) = 77.833$   
7.5m MCAO *versus* sham:  $p = 0.042$ ;  $F(1) = 5.292$   
9m MCAO *versus* sham:  $p = 0.19$ ;  $F(1) = 2.05$   
20m MCAO *versus* sham:  $p = 0.543$ ;  $F(1) = 0.382$

##### *Day3*

6m MCAO *versus* sham:  $p = 0.008$ ;  $F(1) = 10.246$   
7.5m MCAO *versus* sham:  $p = 0.046$ ;  $F(1) = 5.05$   
9m MCAO *versus* sham:  $p = 0.139$ ;  $F(1) = 2.695$   
20m MCAO *versus* sham:  $p = 0.788$ ;  $F(1) = 0.075$

##### *Day4*

6m MCAO *versus* sham:  $p = 0.123$ ;  $F(1) = 2.752$   
7.5m MCAO *versus* sham:  $p < 0.001$ ;  $F(1) = 29.856$   
9m MCAO *versus* sham:  $p = 0.445$ ;  $F(1) = 0.645$   
20m MCAO *versus* sham:  $p = 0.573$ ;  $F(1) = 0.329$

##### *Day5*

6m MCAO *versus* sham:  $p = 0.096$   $F(1) = 3.371$   
7.5m MCAO *versus* sham:  $p < 0.001$ ;  $F(1) = 78.973$   
9m MCAO *versus* sham:  $p = 0.032$ ;  $F(1) = 6.737$   
20m MCAO *versus* sham:  $p = 0.237$ ;  $F(1) = 1.497$

### *Latency:*

#### *Day1*

|                               |                              |
|-------------------------------|------------------------------|
| 6m MCAO <i>versus</i> sham:   | $p = 0.030$ ; $F(1) = 6.174$ |
| 7.5m MCAO <i>versus</i> sham: | $p = 0.922$ ; $F(1) = 0.01$  |
| 9m MCAO <i>versus</i> sham:   | $p = 0.421$ ; $F(1) = 0.72$  |
| 20m MCAO <i>versus</i> sham:  | $p = 0.175$ ; $F(1) = 1.993$ |

#### *Day2*

|                               |                               |
|-------------------------------|-------------------------------|
| 6m MCAO <i>versus</i> sham:   | $p < 0.001$ ; $F(1) = 60.429$ |
| 7.5m MCAO <i>versus</i> sham: | $p = 0.169$ ; $F(1) = 2.169$  |
| 9m MCAO <i>versus</i> sham:   | $p = 0.666$ ; $F(1) = 0.201$  |
| 20m MCAO <i>versus</i> sham:  | $p = 0.643$ ; $F(1) = 0.221$  |

#### *Day3*

|                               |                              |
|-------------------------------|------------------------------|
| 6m MCAO <i>versus</i> sham:   | $p = 0.127$ ; $F(1) = 2.692$ |
| 7.5m MCAO <i>versus</i> sham: | $p = 0.119$ ; $F(1) = 2.864$ |
| 9m MCAO <i>versus</i> sham:   | $p = 0.366$ ; $F(1) = 0.917$ |
| 20m MCAO <i>versus</i> sham:  | $p = 0.785$ ; $F(1) = 0.077$ |

#### *Day4*

|                               |                               |
|-------------------------------|-------------------------------|
| 6m MCAO <i>versus</i> sham:   | $p = 0.872$ ; $F(1) = 0.027$  |
| 7.5m MCAO <i>versus</i> sham: | $p = 0.004$ ; $F(1) = 13.639$ |
| 9m MCAO <i>versus</i> sham:   | $p = 0.958$ ; $F(1) = 0.003$  |
| 20m MCAO <i>versus</i> sham:  | $p = 0.221$ ; $F(1) = 1.593$  |

#### *Day5*

|                               |                               |
|-------------------------------|-------------------------------|
| 6m MCAO <i>versus</i> sham:   | $p = 0.124$ ; $F(1) = 2.817$  |
| 7.5m MCAO <i>versus</i> sham: | $p < 0.001$ ; $F(1) = 38.874$ |
| 9m MCAO <i>versus</i> sham:   | $p = 0.23$ ; $F(1) = 1.69$    |
| 20m MCAO <i>versus</i> sham:  | $p = 0.042$ ; $F(1) = 4.816$  |

### *Velocity:*

#### *Day1*

|                               |                              |
|-------------------------------|------------------------------|
| 6m MCAO <i>versus</i> sham:   | $p = 0.420$ ; $F(1) = 0.702$ |
| 7.5m MCAO <i>versus</i> sham: | $p = 0.477$ ; $F(1) = 0.543$ |
| 9m MCAO <i>versus</i> sham:   | $p = 0.019$ ; $F(1) = 8.605$ |
| 20m MCAO <i>versus</i> sham:  | $p = 0.008$ ; $F(1) = 8.948$ |

#### *Day2*

|                               |                              |
|-------------------------------|------------------------------|
| 6m MCAO <i>versus</i> sham:   | $p = 0.740$ ; $F(1) = 0.116$ |
| 7.5m MCAO <i>versus</i> sham: | $p = 0.041$ ; $F(1) = 5.36$  |
| 9m MCAO <i>versus</i> sham:   | $p = 0.253$ ; $F(1) = 1.515$ |
| 20m MCAO <i>versus</i> sham:  | $p = 0.998$ ; $F(1) = 0.001$ |

#### *Day3*

|                               |                               |
|-------------------------------|-------------------------------|
| 6m MCAO <i>versus</i> sham:   | $p = 0.418$ ; $F(1) = 0.703$  |
| 7.5m MCAO <i>versus</i> sham: | $p = 0.001$ ; $F(1) = 38.767$ |
| 9m MCAO <i>versus</i> sham:   | $p = 0.063$ ; $F(1) = 4.647$  |
| 20m MCAO <i>versus</i> sham:  | $p = 0.547$ ; $F(1) = 0.377$  |

#### *Day4*

|                               |                              |
|-------------------------------|------------------------------|
| 6m MCAO <i>versus</i> sham:   | $p = 0.052$ ; $F(1) = 4.665$ |
| 7.5m MCAO <i>versus</i> sham: | $p = 0.011$ ; $F(1) = 9.224$ |
| 9m MCAO <i>versus</i> sham:   | $p = 0.704$ ; $F(1) = 0.155$ |
| 20m MCAO <i>versus</i> sham:  | $p = 0.206$ ; $F(1) = 1.708$ |

### *Day5*

|                        |                              |
|------------------------|------------------------------|
| 6m MCAO versus sham:   | $p = 0.316$ ; $F(1) = 1.113$ |
| 7.5m MCAO versus sham: | $p = 0.168$ ; $F(1) = 2.183$ |
| 9m MCAO versus sham:   | $p = 0.871$ ; $F(1) = 0.028$ |
| 20m MCAO versus sham:  | $p = 0.039$ ; $F(1) = 4.97$  |

### **Water Maze probe trail data:**

#### Statistical differences between sham and MCAO

##### *NE-quadrant:*

###### *6m groups*

|       |                                                    |
|-------|----------------------------------------------------|
| Sham: | Mdn = 54 %;                                        |
| MCAO: | Mdn = 35 %; $U = 17.00$ ; $n = 14$ ; $p = 0.366$ ; |

###### *7.5m groups*

|       |                                                    |
|-------|----------------------------------------------------|
| Sham: | Mdn = 58 %;                                        |
| MCAO: | Mdn = 45 %; $U = 13.00$ ; $n = 14$ ; $p = 0.156$ ; |

###### *9m groups*

|       |                                                   |
|-------|---------------------------------------------------|
| Sham: | Mdn = 62 %;                                       |
| MCAO: | Mdn = 36 %; $U = 2.00$ ; $n = 11$ ; $p = 0.017$ ; |

###### *20m groups*

|       |                                                  |
|-------|--------------------------------------------------|
| Sham: | Mdn = 32 %;                                      |
| MCAO: | Mdn = 46 %; $U = 49.00$ ; $n = 23$ ; $p = 0.321$ |

##### *SW-quadrant:*

###### *6m groups*

|       |                                                   |
|-------|---------------------------------------------------|
| Sham: | Mdn = 46 %;                                       |
| MCAO: | Mdn = 51 %; $U = 16.00$ ; $n = 12$ ; $p = 1.00$ ; |

###### *7.5m groups*

|       |                                                   |
|-------|---------------------------------------------------|
| Sham: | Mdn = 57 %;                                       |
| MCAO: | Mdn = 33 %; $U = 3.00$ ; $n = 14$ ; $p = 0.005$ ; |

###### *9m groups*

|       |                                                   |
|-------|---------------------------------------------------|
| Sham: | Mdn = 56 %;                                       |
| MCAO: | Mdn = 38 %; $U = 1.00$ ; $n = 11$ ; $p = 0.017$ ; |

###### *20m groups*

|       |                                                  |
|-------|--------------------------------------------------|
| Sham: | Mdn = 35 %                                       |
| MCAO: | Mdn = 38 %; $U = 50.00$ ; $n = 23$ ; $p = 0.352$ |

### **Water Maze hippocampus-dependent strategies:**

#### Statistical differences between sham and MCAO

##### *6 month*

|       |                                       |
|-------|---------------------------------------|
| Day1: | $p = 0.003$ , 95 % CI (1.828; 16.927) |
| Day2: | $p < 0.001$ , 95 % CI (4.336; 208.13) |
| Day3: | $p = 0.015$ , 95 % CI (0.13; 22.22)   |
| Day4: | $p = 0.715$ , 95 % CI (0.265; 2.533)  |

|                  |                                     |
|------------------|-------------------------------------|
| Day5:            | p < 0.001, 95 % CI (0.19; 12.186)   |
| <i>7.5 month</i> |                                     |
| Day1:            | p = 0.729, 95 % CI (0.348; 4.48)    |
| Day2:            | p = 0.008, 95 % CI (1.02; 9.737)    |
| Day3:            | p = 0.043, 95 % CI (1.042; 5.437)   |
| Day4:            | p = 0.003, 95 % CI (0.039; 0.612)   |
| Day5:            | p < 0.001, 95 % CI (16.03; 775.479) |
| <i>9 month</i>   |                                     |
| Day1:            | p = 0.304, 95 % CI (0.103; 2.087)   |
| Day2:            | p = 0.602, 95 % CI (0.404; 4.10)    |
| Day3:            | p = 0.219, 95 % CI (0.586; 8.679)   |
| Day4:            | p = 0.515, 95 % CI (0.444; 4.416)   |
| Day5:            | p = 0.016, 95 % CI (1.223; 6.823)   |
| <i>20 month</i>  |                                     |
| Day1:            | p = 0.792, 95 % CI (0.499; 2.455)   |
| Day2:            | p = 0.734, 95 % CI (0.345; 2.105)   |
| Day3:            | p = 0.606, 95 % CI (0.331; 1.893)   |
| Day4:            | p = 0.530, 95 % CI (0.303; 1.818)   |
| Day5:            | p = 0.529, 95 % CI (0.652; 2.286)   |

### **Water Maze hippocampus-independent and -dependent strategies:**

#### *strategy 1*

|                                    |                                        |
|------------------------------------|----------------------------------------|
| group:                             | p = 0.022; df = 1; Chi_Square = 5.214  |
| age:                               | p = 0.109; df = 3; Chi_Square = 6.050  |
| day:                               | p < 0.001; df = 4; Chi_Square = 31.046 |
| interaction between group and day: | p = 0.339; df = 4; Chi_Square = 4.532  |

#### *strategy 2*

|                                    |                                        |
|------------------------------------|----------------------------------------|
| group:                             | p < 0.001; df = 1; Chi_Square = 23.173 |
| age:                               | p = 0.009; df = 3; Chi_Square = 11.611 |
| day:                               | p < 0.001; df = 4; Chi_Square = 92.262 |
| interaction between group and day: | p = 0.002; df = 4; Chi_Square = 16.931 |

#### *strategy 3*

|                                    |                                        |
|------------------------------------|----------------------------------------|
| group:                             | p = 0.513; df = 1; Chi_Square = 0.428  |
| age:                               | p = 0.453; df = 3; Chi_Square = 2.628  |
| day:                               | p < 0.001; df = 4; Chi_Square = 24.302 |
| interaction between group and day: | p = 0.007; df = 4; Chi_Square = 14.159 |

#### *strategy 4*

|                                    |                                          |
|------------------------------------|------------------------------------------|
| group:                             | p < 0.001; df = 1; Chi_Square = 33.291   |
| age:                               | p = 0.096; df = 3; Chi_Square = 6.334    |
| day:                               | p < 0.001; df = 4; Chi_Square = 220.117  |
| interaction between group and day: | p < 0.001 ; df = 4; Chi_Square = 166.647 |

#### *strategy 5*

|                                    |                                        |
|------------------------------------|----------------------------------------|
| group:                             | p = 0.001; df = 1; Chi_Square = 10.763 |
| age:                               | p = 0.468; df = 3; Chi_Square = 2.541  |
| day:                               | p < 0.001; df = 4; Chi_Square = 45.465 |
| interaction between group and day: | p = 0.990; df = 4; Chi_Square = 0.297  |

#### *strategy 6*

group: p = 0.087; df = 1; Chi\_Square = 2.932  
age: p = 0.925; df = 3; Chi\_Square = 0.471  
day: p < 0.001; df = 4; Chi\_Square = 23.217  
interaction between group and day: p = 0.094; df = 4; Chi\_Square = 7.923

#### *strategy 7*

group: p = 0.101; df = 1; Chi\_Square = 2.689  
age: p = 0.067; df = 3; Chi\_Square = 7.161  
day: p < 0.001; df = 4; Chi\_Square = 23.347  
interaction between group and day: p = 0.082; df = 4; Chi\_Square = 8.280

#### *strategy 8*

group: p = 0.799; df = 1; Chi\_Square = 0.065  
age: p = 0.516; df = 3; Chi\_Square = 2.280  
day: p < 0.001; df = 4; Chi\_Square = 64.429  
interaction between group and day: p = 0.005; df = 4; Chi\_Square = 15.048

### **Water Maze hippocampus-independent and -dependent strategies per day:**

#### Statistical differences between sham and MCAO

#### *6 month-groups:*

##### *Day1*

strategy 5: p = 0.022, 95 % CI (0.04; 0.776)

##### *Day2*

strategy 2: p = 0.001, 95 % CI (1.977; 12.332)

strategy 3: p < 0.001, 95 % CI (0.159; 1.244)

strategy 5: p = 0.008, 95 % CI (0.008; 0.481)

##### *Day3*

strategy 3: p = 0.001, 95 % CI (1.196; 10.661)

strategy 5: p = 0.001, 95 % CI (0.067; 0.969)

#### *7.5 month-old groups:*

##### *Day1*

strategy 2: p = 0.034, 95 % CI (0.217; 0.943)

##### *Day2*

strat2: p = 0.027, 95 % CI (1.149; 9.627)

#### *9 month-old groups:*

##### *Day1*

strategy 2: p = 0.042, 95 % CI (0.076; 0.953)

strategy 5: p = 0.041, 95 % CI (1.091; 77.780)

##### *Day2*

strategy 2: p = 0.005, 95 % CI (2.063; 30.579)

#### *6-month-old groups:*

strategy 3: p < 0.001, 95 % CI (1.716; 12.407)

strategy 7: p = 0.022, 95 % CI (0.058; 0.746)

#### *7.5-month-old groups:*

strategy 2: p = 0.016, 95 % CI (0.217; 0.943)

strategy 3: p = 0.019, 95 % CI (0.485; 4.629)

strategy 5: p = 0.012, 95 % CI (0.210; 2.432)

strategy 6: p = 0.036, 95 % CI (0.014; 0.866)

strategy 7:

$p = 0.005$ , 95 % CI (0.010; 0.441)

*9 month-old groups:*

strategy 2:

$p = 0.029$ , 95 % CI (1.228; 69.112)

*20-month-old groups:*

strategy 2:

$p = 0.029$ , 95 % CI (1.430; 77.20)
