# Supplementary material for: Early Stroke Induces Long-Term Impairment of Adult Neurogenesis Accompanied by Hippocampal-Mediated Cognitive Decline
Source: MDPI journal article supplement (doi:10.3390/cells8121654), 2019-12-17
Supplement: s1 [file s1]

## Supplement S7

Table: Percentage usage of hippocampal-dependent strategies

| Groups            | day1  |       | day2  |       | day3  |       | day4  |       | day5  |       |
|-------------------|-------|-------|-------|-------|-------|-------|-------|-------|-------|-------|
|                   | MW    | SEM   |
| 6 month<br>MCAO   | 5,67  | 3,58  | 2,83  | 2,83  | 47,00 | 16,83 | 27,67 | 6,98  | 31,67 | 8,09  |
| 6 month<br>sham   | 33,30 | 7,87  | 45,60 | 9,49  | 76,90 | 6,46  | 27,00 | 8,95  | 66,80 | 6,05  |
| 7.5 month<br>MCAO | 19,50 | 7,93  | 25,00 | 11,18 | 50,00 | 9,58  | 8,50  | 3,80  | 5,67  | 3,58  |
| 7.5 month<br>sham | 22,88 | 9,89  | 54,25 | 5,38  | 70,75 | 5,83  | 29,25 | 6,68  | 74,88 | 5,20  |
| 9 month<br>MCAO   | 29,00 | 10,46 | 29,25 | 7,88  | 46,00 | 17,06 | 37,50 | 10,53 | 37,50 | 10,53 |
| 9 month<br>sham   | 16,80 | 9,13  | 43,40 | 12,55 | 66,40 | 10,51 | 30,00 | 13,38 | 60,00 | 6,63  |
| 20 month<br>MCAO  | 26,92 | 7,17  | 33,23 | 4,62  | 49,38 | 8,98  | 25,69 | 5,85  | 48,72 | 7,17  |
| 20 month<br>sham  | 31,50 | 2,94  | 30,10 | 9,25  | 43,40 | 8,57  | 30,20 | 8,17  | 58,20 | 6,70  |
