# Supplementary material for: Early Stroke Induces Long-Term Impairment of Adult Neurogenesis Accompanied by Hippocampal-Mediated Cognitive Decline
Source: MDPI journal article supplement (doi:10.3390/cells8121654), 2019-12-17
Supplement: s1 [file s1]

## Supplement S5

### Total number of precursor cells

#### Statistical differences between sham and MCAO

type 1 cells:

sham: Mdn = 1800 cells; IqR = 1404

MCAO: Mdn = 2928 cells; IqR = 1728; U = 12; n = 13; p = 0.242

type 2a cells:

sham: Mdn = 624 cells; IqR = 540

MCAO: Mdn = 768 cells; IqR = 516; U = 13.00; n = 11; p = 0.715

type 2b cells:

sham: Mdn = 168 cells; IqR = 180

MCAO: Mdn = 120 cells; IqR = 162; U = 7.5; n = 11; p = 0.169

type 3 cells:

sham: Mdn = 240 cells; IqR = 228

MCAO: Mdn = 132 cells; IqR = 78; U = 11.00; n = 11; p = 0.460

immature cells:

sham: Mdn = 240 cells; IqR = 204

MCAO: Mdn = 72 cells; IqR = 90; U = 2.50; n = 11; p = 0.022

### Total number of PCNA-positive cells

#### Statistical differences between sham and MCAO

type 1 cells:

sham: Mdn = 12 cells; IqR = 48

MCAO: Mdn = 42 cells; IqR = 21; U = 7.00; n = 9; p = 0.453

type 2a cells:

sham: Mdn = 192 cells; IqR = 204

MCAO: Mdn = 144 cells; IqR = 93; U = 8.00; n = 9; p = 0.623

type 2b cells:

sham: Mdn = 24 cells; IqR = 18

MCAO: Mdn = 42 cells; IqR = 75; U = 6.00; n = 9; p = 0.317

type 3 cells:

sham: Mdn = 24 cells; IqR = 18

MCAO: Mdn = 0 cells; IqR = 18; U = 5.00; n = 11; p = 0.180

## **Distribution of branched- and unbranched cells**

### **Statistical differences between sham and MCAO**

branched stem cells:

sham:  $65 \pm 12 \%$

MCAO Mdn =  $69 \pm 14 \%$ ;  $U = 16.50$ ;  $n = 13$ ;  $p = 0.607$

unbranched stem cells:

sham  $35 \pm 12 \%$

MCAO Mdn =  $31 \pm 14 \%$ ;  $U = 16.50$ ;  $n = 13$ ;  $p = 0.607$
