# Supplementary material for: Early Stroke Induces Long-Term Impairment of Adult Neurogenesis Accompanied by Hippocampal-Mediated Cognitive Decline
Source: MDPI journal article supplement (doi:10.3390/cells8121654), 2019-12-17
Supplement: s1 [file s1]

## Supplement S2: Brain, lesion, hippocampal and dentate gyrus volumes

### Statistical differences between sham and MCAO groups

#### Brain volume

##### 6 month group:

sham Mdn = 203 mm<sup>3</sup>; IqR = 38.50

MCAO Mdn = 194 mm<sup>3</sup>; IqR = 33.50; U = 29.50; n = 16; p = 0.235

##### 7.5 month group:

sham Mdn = 192 mm<sup>3</sup>; IqR = 30.50

MCAO Mdn = 192 mm<sup>3</sup>; IqR = 44.00; U = 41.00; n = 16; p = 0.780

##### 9 month group:

sham Mdn = 215 mm<sup>3</sup>; IqR = 21.75

MCAO Mdn = 143 mm<sup>3</sup>; IqR = 74.00; U = 6.00; n = 12 ; p = 0.109

##### 20 month group:

sham Mdn = 204 mm<sup>3</sup>; IqR = 9.91

MCAO Mdn = 195 mm<sup>3</sup>; IqR = 16.86; U = 25.00; n = 17; p = 0.113

#### Hippocampal volume

##### 6 month group:

sham Mdn = 6.1 mm<sup>3</sup>; IqR = 22.50

MCAO Mdn = 5.2 mm<sup>3</sup>; IqR = 16.00; U = 6.50; n = 10; p = 0.222

##### 7.5 month group:

sham Mdn = 5.4 mm<sup>3</sup>; IqR = 21.25

MCAO Mdn = 5.1 mm<sup>3</sup>; IqR = 19.25; U = 8.00; n = 11; p = 0.247

##### 9 month group:

sham Mdn = 5.7 mm<sup>3</sup>; IqR = 13.25

MCAO Mdn = 3.5 mm<sup>3</sup>; IqR = 28.25; U = 4.00; n = 10; p = 0.114

#### Dentate gyrus volume

##### 6 month group:

sham Mdn = 0.67 mm<sup>3</sup>; IqR = 0.18

MCAO Mdn = 0.65 mm<sup>3</sup>; IqR = 0.13; U = 27.00; n = 16; p = 0.500

##### 7.5 month group:

sham Mdn = 0.55 mm<sup>3</sup>; IqR = 0.13

MCAO Mdn = 0.72 mm<sup>3</sup>; IqR = 0.39; U = 11.00; n = 13; p = 0.222

##### 9 month group:

sham Mdn = 0.58 mm<sup>3</sup>; IqR = 0.05

MCAO Mdn = 0.45 mm<sup>3</sup>; IqR = 0.28; U = 8.00; n = 12; p = 0.214

20 month group:

sham Mdn = 0.60 mm<sup>3</sup>; IqR = 0.07

MCAO Mdn = 0.62 mm<sup>3</sup>; IqR = 0.17; U = 6.00; n = 10; p = 0.172

### Statistical differences within the MCAO groups

#### Brain volume

6m *versus* 7.5m: U = 25.50, n = 15, p = 0.635

6m *versus* 9m: U = 6.00, n = 10, p = 0.257

7.5m *versus* 9m: U = 6.00, n = 10, p = 0.257

6m *versus* 20m: U = 23.00, n = 16, p = 0.492

7.5m *versus* 20m: U = 45.00, n = 20, p = 0.739

9m *versus* 20m: U = 10.00, n = 14, p = 0.188

#### Lesion volume

6 month group: Mdn = 2.9 mm<sup>3</sup>; IqR = 1.25

7.5 month group: Mdn = 2.1 mm<sup>3</sup>; IqR = 0.50

9 month group: Mdn = 2.4 mm<sup>3</sup>; IqR = 1.00

20 month group: Mdn = 1.89 m<sup>3</sup>; IqR = 0.82

6m *versus* 7.5m: U = 18.00, n = 15, p = 0.220

7.5m *versus* 9m: U = 15.00, n = 10, p = 0.539

6m *versus* 9m: U = 9.00, n = 10, p = 0.610

6m *versus* 20m: U = 4.00, n = 12, p = 0.024

7.5m *versus* 20m: U = 20.00, n = 16, p = 0.313

9m *versus* 20m: U = 20.00, n = 16, p = 0.257

### Statistical differences within the sham groups

#### Brain volume

6m *versus* 7.5m: U = 56.00, n = 24, p = 0.519

7.5m *versus* 9m: U = 6.50, n = 17, p = 0.002

6m *versus* 9m: U = 25.00, n = 23, p = 0.024

6m *versus* 20m: U = 65.00, n = 24, p = 0.907

7.5m *versus* 20m: U = 29.00, n = 18, p = 0.340

9m *versus* 20m: U = 7.00, n = 17, p = 0.004
