# Supplementary material for: Early Stroke Induces Long-Term Impairment of Adult Neurogenesis Accompanied by Hippocampal-Mediated Cognitive Decline
Source: MDPI journal article supplement (doi:10.3390/cells8121654), 2019-12-17
Supplement: s1 [file s1]

## Supplement S1

Table: Primary antibodies and secondary antibodies

| Primary antibody     | Dilution  | Source                           |
|----------------------|-----------|----------------------------------|
| mouse anti MAP2      | 1 : 10000 | Sigma-Aldrich, USA               |
| rabbit anti Ki67     | 1 : 400   | Leica, Wetzlar, Germany          |
| rat anti BrdU        | 1 : 500   | AbD Serotec, Kidlington, UK      |
| mouse anti NeuN      | 1 : 500   | Chemicon; Billerica, USA         |
| goat anti GFP        | 1 : 500   | Acris, Germany                   |
| guinea pig anti DCX  | 1 : 500   | Millipore, UK                    |
| rabbit anti GFAP     | 1 : 500   | Synaptic Systems, Germany        |
| guinea pig anti GFAP | 1 : 500   | Zytomed Systems, Berlin, Germany |
| mouse anti PCNA      | 1 : 500   | Signet, USA                      |
| rabbit anti RFP      | 1 : 500   | Abcam, UK                        |

| Secondary antibody                  | Dilution | Source                    |
|-------------------------------------|----------|---------------------------|
| IgG biotinylated donkey anti rabbit | 1 : 500  | Dianova, Hamburg, Germany |
| IgG biotinylated donkey anti rat    | 1 : 500  | Dianova, Hamburg, Germany |
| IgG biotinylated donkey anti mouse  | 1 : 500  | Dianova, Hamburg, Germany |
| Rhodamine anti-rat                  | 1 : 500  | Dianova, Hamburg, Germany |
| Rhodamine anti-mouse                | 1 : 500  | Dianova, Hamburg, Germany |
| Rhodamine anti-rabbit               | 1 : 500  | Dianova, Hamburg, Germany |
| Alexa Fluor 488 anti-goat           | 1 : 500  | Invitrogen, Carlsbad, CA  |
| Cy5 anti-guinea pig                 | 1 : 500  | Dianova, Hamburg, Germany |
| Cy5 anti-mouse                      | 1 : 500  | Dianova, Hamburg, Germany |
