# Supplementary material for: Early Stroke Induces Long-Term Impairment of Adult Neurogenesis Accompanied by Hippocampal-Mediated Cognitive Decline
Source: MDPI journal article supplement (doi:10.3390/cells8121654), 2019-12-17
Supplement: s1 [file s1]

## Supplemental S4

Table: Parameters estimate for Sholl analysis of retroviral vector labelled neurons

|                          | MCAO          |            | Sham          |            |            |                |
|--------------------------|---------------|------------|---------------|------------|------------|----------------|
| Radius ( $\mu\text{m}$ ) | Intersections | $\pm$ SEM  | Intersections | $\pm$ SEM  | F-value    | p-value        |
| 10                       | 1.167         | $\pm$ 0.18 | 1.286         | $\pm$ 0.17 | F(1)=0.223 | p=0.646        |
| 15                       | 1.333         | $\pm$ 0.37 | 1.42          | $\pm$ 0.37 | F(1)=0.064 | p=0.805        |
| 20                       | 2.16          | $\pm$ 0.36 | 1.42          | $\pm$ 0.33 | F(1)=2.265 | p=0.160        |
| 25                       | 2.16          | $\pm$ 0.43 | 1.57          | $\pm$ 0.40 | F(1)=1.004 | p=0.338        |
| 30                       | 2.33          | $\pm$ 1.43 | 2.86          | $\pm$ 0.39 | F(1)=0.800 | p=0.390        |
| 35                       | 2.50          | $\pm$ 0.45 | 3.00          | $\pm$ 0.41 | F(1)=0.658 | p=0.434        |
| 40                       | 2.50          | $\pm$ 0.45 | 3.00          | $\pm$ 0.41 | F(1)=0.658 | p=0.434        |
| 45                       | 3.17          | $\pm$ 0.35 | 4.28          | $\pm$ 0.32 | F(1)=5.387 | <b>p=0.041</b> |
| 50                       | 3.00          | $\pm$ 0.45 | 4.71          | $\pm$ 0.41 | F(1)=7.77  | p=0.018        |
| 55                       | 3.67          | $\pm$ 0.55 | 4.86          | $\pm$ 0.51 | F(1)=2.495 | p=0.143        |
| 60                       | 3.67          | $\pm$ 0.56 | 4.43          | $\pm$ 0.52 | F(1)=0.98  | p=0.343        |
| 65                       | 4.00          | $\pm$ 0.57 | 4.71          | $\pm$ 0.52 | F(1)=0.846 | p=0.377        |
| 70                       | 3.83          | $\pm$ 0.51 | 4.86          | $\pm$ 0.47 | F(1)=2.106 | p=0.175        |
| 75                       | 4.17          | $\pm$ 0.55 | 4.71          | $\pm$ 0.51 | F(1)=0.526 | p=0.483        |
| 80                       | 3.83          | $\pm$ 0.46 | 4.57          | $\pm$ 0.43 | F(1)=1.331 | p=0.273        |
| 85                       | 3.83          | $\pm$ 0.46 | 4.57          | $\pm$ 0.43 | F(1)=1.331 | p=0.273        |
| 90                       | 3.50          | $\pm$ 0.41 | 5.00          | $\pm$ 0.38 | F(1)=6.95  | <b>p=0.023</b> |
| 100                      | 4.17          | $\pm$ 0.38 | 4.86          | $\pm$ 0.35 | F(1)=1.748 | p=0.213        |
| 105                      | 4.17          | $\pm$ 0.44 | 5.00          | $\pm$ 0.40 | F(1)=1.923 | p=0.193        |
| 110                      | 4.33          | $\pm$ 0.48 | 5.00          | $\pm$ 0.44 | F(1)=1.030 | p=0.332        |
| 115                      | 4.50          | $\pm$ 0.60 | 4.86          | $\pm$ 0.56 | F(1)=0.186 | p=0.675        |
| 120                      | 4.50          | $\pm$ 0.56 | 4.57          | $\pm$ 0.52 | F(1)=0.009 | p=0.928        |
| 125                      | 5.17          | $\pm$ 0.63 | 4.57          | $\pm$ 0.58 | F(1)=0.474 | p=0.505        |
| 130                      | 4.83          | $\pm$ 0.61 | 4.57          | $\pm$ 0.56 | F(1)=0.099 | p=0.759        |
| 135                      | 4.50          | $\pm$ 0.61 | 4.57          | $\pm$ 0.57 | F(1)=0.007 | p=0.934        |

|     |      |        |       |        |            |                |
|-----|------|--------|-------|--------|------------|----------------|
| 140 | 4.50 | ± 0.71 | 5.00  | ± 0.66 | F(1)=0.265 | p=0.617        |
| 145 | 4.33 | ± 0.73 | 5.00  | ± 0.67 | F(1)=0.447 | p=0.518        |
| 150 | 4.33 | ± 0.76 | 4.86  | ± 0.70 | F(1)=0.255 | p=0.623        |
| 155 | 4.83 | ± 0.92 | 5.29  | ± 0.85 | F(1)=0.129 | p=0.726        |
| 160 | 4.50 | ± 0.94 | 5.43  | ± 0.87 | F(1)=0.517 | p=0.487        |
| 165 | 4.33 | ± 1.03 | 5.57  | ± 0.96 | F(1)=0.767 | p=0.40         |
| 170 | 4.00 | ± 0.76 | 5.83  | ± 0.76 | F(1)=2.895 | p=0.12         |
| 175 | 3.67 | ± 0.58 | 5.17  | ± 0.58 | F(1)=3.347 | p=0.097        |
| 180 | 3.50 | ± 0.58 | 5.17  | ± 0.58 | F(1)=4.098 | p=0.070        |
| 185 | 3.17 | ± 0.70 | 4.67  | ± 0.70 | F(1)=2.238 | p=0.166        |
| 190 | 3.00 | ± 0.71 | 4.17  | ± 0.71 | F(1)=1.324 | p=0.277        |
| 195 | 3.00 | ± 0.77 | 4.00  | ± 0.77 | F(1)=0.833 | p=0.383        |
| 200 | 3.00 | ± 0.74 | 3.17  | ± 0.74 | F(1)=0.025 | p=0.877        |
| 205 | 3.00 | ± 0.76 | 3.33  | ± 0.76 | F(1)=0.094 | p=0.765        |
| 210 | 3.00 | ± 0.59 | 2.50  | ± 0.59 | F(1)=0.349 | p=0.568        |
| 215 | 3.00 | ± 0.48 | 2.00  | ± 0.48 | F(1)=2.143 | p=0.174        |
| 220 | 2.83 | ± 0.45 | 1.33  | ± 0.45 | F(1)=5.548 | <b>p=0.040</b> |
| 225 | 2.50 | ± 0.56 | 1.50  | ± 0.56 | F(1)=0.579 | p=0.237        |
| 230 | 2.17 | ± 0.26 | 0.667 | ± 0.26 | F(1)=16.20 | <b>p=0.002</b> |

Statistical differences of intersections between the groups are validated by one-way ANOVA (dependent factors: days; factors: group).
